# Supplementary material for: Evaluating the potential of chelation therapy to prevent and treat gadolinium deposition from MRI contrast agents
Source: PubMed Central journal article supplement (PMC5849765; doi:10.1038/s41598-018-22511-6), 2018-03-13

## **Supporting Information**

### **Evaluating the potential of chelation therapy to prevent and treat gadolinium deposition from MRI contrast agents**

Julian A. Rees<sup>a</sup>, Gauthier J.-P. Deblonde<sup>a</sup>, Dahlia D. An<sup>a</sup>, Camille Ansoborlo<sup>a</sup>, Stacey S. Gauny<sup>a</sup>,  
Rebecca J. Abergel<sup>a,b,\*</sup>

<sup>a</sup>Chemical Sciences Division, Lawrence Berkeley National Laboratory, 1 Cyclotron Road, Berkeley, CA 94720, USA

<sup>b</sup>Nuclear Engineering Department, University of California, Berkeley, CA 94720, USA

\*To whom correspondence should be addressed. E-mail: [rjabergel@lbl.gov](mailto:rjabergel@lbl.gov); Fax: +1 510 486 5596; Tel: +1 510 486 5249.

**Supporting Table S1. Treatment details for each group.** Treatment times are referenced to the  $^{153}\text{Gd}$  contamination event.

| Group | Ligand | Time       | Treatment                |
|-------|--------|------------|--------------------------|
| A     | Saline | 1 hr pre   | 100 $\mu\text{mol}$ / kg |
| B     | HOPO   | 24 hr pre  | 100 $\mu\text{mol}$ / kg |
| C     | HOPO   | 1 hr pre   | 100 $\mu\text{mol}$ / kg |
| D     | DTPA   | 1 hr pre   | 100 $\mu\text{mol}$ / kg |
| E     | HOPO   | 1 hr post  | 100 $\mu\text{mol}$ / kg |
| F     | DTPA   | 1 hr post  | 100 $\mu\text{mol}$ / kg |
| G     | HOPO   | 24 hr post | 100 $\mu\text{mol}$ / kg |
| H     | HOPO   | 48 hr post | 100 $\mu\text{mol}$ / kg |

**Supporting Table S2.  $^{153}\text{Gd}$  content of murine tissues and excreta for all groups.** Data are reported as arithmetic means  $\pm$  standard deviations in % of the recovered dose. Excreta were collected by group, therefore only the mean is reported.

Table 1:  $^{153}\text{Gd}$  content in % of the recovered dose in % of the recovered dose

| Group | Skeleton           |
|-------|--------------------|
| A     | 40.5 $\pm$ 1.3     |
| B     | 3.88 $\pm$ 0.99    |
| C     | 0.0359 $\pm$ 0.072 |
| D     | 7.59 $\pm$ 1       |
| E     | 13.6 $\pm$ 1.6     |
| F     | 31.4 $\pm$ 1.7     |
| G     | 29.2 $\pm$ 1.2     |
| H     | 28.4 $\pm$ 1       |

**Supporting Table S3.** Equilibria and corresponding stability constants used in the speciation study.

| Equilibrium                                                                                                           | log K | Reference                            |
|-----------------------------------------------------------------------------------------------------------------------|-------|--------------------------------------|
| $\text{Gd}^{3+} + \text{PO}_4^{3-} = [\text{GdPO}_4]_{(\text{aq})}$                                                   | 12.19 | NIST                                 |
| $\text{Gd}^{3+} + \text{HPO}_4^{2-} = [\text{GdHPO}_4]^+$                                                             | 5.91  | NIST                                 |
| $\text{Gd}^{3+} + 2 \text{HPO}_4^{2-} = [\text{Gd}(\text{HPO}_4)_2]^-$                                                | 9.97  | NIST                                 |
| $\text{Gd}^{3+} + \text{H}_2\text{PO}_4^- = [\text{GdH}_2\text{PO}_4]^{2+}$                                           | 2.74  | NIST                                 |
| $\text{Gd}^{3+} + \text{C}_2\text{O}_4^{2-} = [\text{GdC}_2\text{O}_4]^+$                                             | 4.77  | NIST                                 |
| $\text{Gd}^{3+} + 2 \text{C}_2\text{O}_4^{2-} = [\text{Gd}(\text{C}_2\text{O}_4)]^-$                                  | 8.66  | NIST                                 |
| $\text{Gd}^{3+} + \text{Lactate}^- = [\text{GdLactate}]^{2+}$                                                         | 2.91  | NIST                                 |
| $\text{Gd}^{3+} + 2 \text{Lactate}^- = [\text{GdLactate}_2]^+$                                                        | 5.04  | NIST                                 |
| $\text{Gd}^{3+} + 3 \text{Lactate}^- = [\text{GdLactate}_3]$                                                          | 6.24  | NIST                                 |
| $\text{Gd}^{3+} + \text{Citrate}^{3-} + \text{H}^+ = [\text{GdHCitrate}]$                                             | 21.2  | Heller 2012 <sup>a</sup>             |
| $\text{Gd}^{3+} + 2 \text{Citrate}^{3-} + 3 \text{H}^+ = [\text{Gd}(\text{H}_2\text{Citrate})(\text{HCitrate})]^{2-}$ | 43.6  | Heller 2012 <sup>a</sup>             |
| $\text{Gd}^{3+} + 2 \text{Citrate}^{3-} + 2 \text{H}^+ = [\text{Gd}(\text{HCitrate})_2]^{3-}$                         | 38.5  | Heller 2012 <sup>a</sup>             |
| $\text{Gd}^{3+} + 2 \text{Citrate}^{3-} = [\text{GdCitrate}_2]^{5-}$                                                  | 21.0  | Heller 2012 <sup>a</sup>             |
| $\text{Gd}^{3+} + \text{CO}_3^{2-} = [\text{GdCO}_3]^+$                                                               | 7.64  | NIST                                 |
| $\text{Gd}^{3+} + 2 \text{CO}_3^{2-} = [\text{Gd}(\text{CO}_3)_2]^-$                                                  | 13.04 | NIST                                 |
| $\text{Gd}^{3+} + \text{HCO}_3^- = [\text{GdHCO}_3]^{2+}$                                                             | 1.9   | NIST                                 |
| $\text{Gd}^{3+} + \text{DTPA}^{5-} = [\text{GdDTPA}]^{2-}$                                                            | 22.39 | NIST                                 |
| $[\text{GdDTPA}]^{2-} + \text{H}^+ = [\text{GdHDTPA}]^-$                                                              | 2.39  | NIST                                 |
| $\text{Gd}^{3+} + \text{DOTA}^{4-} = [\text{GdDOTA}]^-$                                                               | 24.0  | NIST                                 |
| $\text{Gd}^{3+} + \text{DTPA-BMA}^{3-} = [\text{GdDTPA-BMA}]$                                                         | 16.86 | NIST                                 |
| $\text{Gd}^{3+} + \text{EDTA}^{4-} = [\text{GdEDTA}]^-$                                                               | 17.35 | NIST                                 |
| $[\text{GdEDTA}]^- + \text{H}^+ = [\text{GdHEDTA}]$                                                                   | 1.3   | NIST                                 |
| $\text{Gd}^{3+} + \text{HOPO}^{4-} = [\text{GdHOPO}]^-$                                                               | 20.5  | Sturzbecher-Hoehne 2011 <sup>b</sup> |
| $[\text{GdHOPO}]^- + \text{H}^+ = [\text{GdHHOPO}]$                                                                   | 1.2   | Sturzbecher-Hoehne 2011 <sup>b</sup> |
| $\text{Gd}^{3+} + \text{H}_2\text{O} = [\text{GdOH}]^{2+} + \text{H}^+$                                               | -8.1  | Sturzbecher-Hoehne 2011 <sup>b</sup> |
| $\text{Gd}^{3+} + 2 \text{H}_2\text{O} = [\text{Gd}(\text{OH})_2]^+ + 2 \text{H}^+$                                   | -14.5 | Sturzbecher-Hoehne 2011 <sup>b</sup> |
| $\text{Gd}^{3+} + 3 \text{H}_2\text{O} = [\text{Gd}(\text{OH})_3] + 3 \text{H}^+$                                     | -24.1 | Sturzbecher-Hoehne 2011 <sup>b</sup> |
|                                                                                                                       |       |                                      |
| $\text{Zn}^{2+} + \text{DTPA}^{5-} = [\text{ZnDTPA}]^{3-}$                                                            | 18.2  | NIST                                 |
| $[\text{ZnDTPA}]^{3-} + \text{H}^+ = [\text{ZnHDTPA}]^{2-}$                                                           | 5.6   | NIST                                 |
| $[\text{ZnDTPA}]^{3-} + \text{Zn}^{2+} = [\text{Zn}_2\text{DTPA}]^-$                                                  | 4.48  | NIST                                 |
| $\text{Zn}^{2+} + \text{EDTA}^{4-} = [\text{ZnEDTA}]^{2-}$                                                            | 16.5  | NIST                                 |
| $[\text{ZnEDTA}]^{2-} + \text{H}^+ = [\text{ZnHEDTA}]^-$                                                              | 3.0   | NIST                                 |
| $\text{Zn}^{2+} + \text{DTPA-BMA}^{3-} = [\text{ZnDTPA-BMA}]^-$                                                       | 12.04 | NIST                                 |
| $\text{Zn}^{2+} + \text{HPO}_4^{2-} = [\text{ZnHPO}_4]$                                                               | 2.46  | NIST                                 |
| $\text{Zn}^{2+} + \text{H}_2\text{PO}_4^- = [\text{ZnH}_2\text{PO}_4]^+$                                              | 1.2   | NIST                                 |
| $\text{Zn}^{2+} + \text{Oxalate}^{2-} = [\text{ZnOxalate}]$                                                           | 4.0   | NIST                                 |
| $\text{Zn}^{2+} + 2 \text{Oxalate}^{2-} = [\text{ZnOxalate}_2]^{2-}$                                                  | 6.45  | NIST                                 |
| $\text{Zn}^{2+} + \text{Lactate}^- = [\text{ZnLactate}]^+$                                                            | 1.86  | NIST                                 |
| $\text{Zn}^{2+} + 2 \text{Lactate}^- = [\text{ZnLactate}_2]$                                                          | 2.6   | NIST                                 |
| $\text{Zn}^{2+} + 3 \text{Lactate}^- = [\text{ZnLactate}_3]^-$                                                        | 3.4   | NIST                                 |
| $\text{Zn}^{2+} + \text{CO}_3^{2-} = [\text{ZnCO}_3]$                                                                 | 3.9   | NIST                                 |
| $\text{Zn}^{2+} + 2 \text{CO}_3^{2-} = [\text{Zn}(\text{CO}_3)_2]^{2-}$                                               | 7.3   | NIST                                 |

|                                                                                |       |                          |
|--------------------------------------------------------------------------------|-------|--------------------------|
| $\text{Zn}^{2+} + \text{HCO}_3^- = [\text{ZnHCO}_3]^+$                         | 1.5   | NIST                     |
| $\text{Zn}^{2+} + \text{Citrate}^{3-} = [\text{ZnCitrate}]^-$                  | 4.93  | NIST                     |
| $\text{Zn}^{2+} + 2 \text{Citrate}^{3-} = [\text{ZnCitrate}_2]^{4-}$           | 6.8   | NIST                     |
| $\text{Zn}^{2+} + \text{HCitrate}^{2-} = [\text{ZnHCitrate}]$                  | 3.00  | NIST                     |
| $\text{Zn}^{2+} + \text{H}_2\text{Citrate}^- = [\text{ZnH}_2\text{Citrate}]^+$ | 1.2   | NIST                     |
| $\text{Zn}^{2+} + \text{HO}^- = [\text{ZnOH}]^+$                               | 4.6   | NIST                     |
| $\text{Zn}^{2+} + 2 \text{HO}^- = [\text{Zn}(\text{OH})_2]$                    | 11.1  | NIST                     |
| $\text{Zn}^{2+} + 3 \text{HO}^- = [\text{Zn}(\text{OH})_3]^-$                  | 13.6  | NIST                     |
| $\text{Zn}^{2+} + 4 \text{HO}^- = [\text{Zn}(\text{OH})_4]^{2-}$               | 14.8  | NIST                     |
|                                                                                |       |                          |
| $\text{Ca}^{2+} + \text{DTPA}^{5-} = [\text{CaDTPA}]^{3-}$                     | 10.75 | NIST                     |
| $[\text{CaDTPA}]^{3-} + \text{H}^+ = [\text{CaHDTPA}]^{2-}$                    | 6.11  | NIST                     |
| $[\text{CaDTPA}]^{3-} + \text{Ca}^{2+} = [\text{Ca}_2\text{DTPA}]^-$           | 1.6   | NIST                     |
| $\text{Ca}^{2+} + \text{EDTA}^{4-} = [\text{CaEDTA}]^{2-}$                     | 10.65 | NIST                     |
| $\text{Ca}^{2+} + \text{DTPA-BMA}^{3-} = [\text{CaDTPA-BMA}]^-$                | 7.17  | NIST                     |
| $\text{Ca}^{2+} + \text{HPO}_4^{2-} = [\text{CaHPO}_4]$                        | 1.62  | NIST                     |
| $\text{Ca}^{2+} + \text{H}_2\text{PO}_4^- = [\text{CaH}_2\text{PO}_4]^+$       | 0.6   | NIST                     |
| $\text{Ca}^{2+} + \text{Oxalate}^{2-} = [\text{CaOxalate}]$                    | 2.46  | NIST                     |
| $\text{Ca}^{2+} + \text{CO}_3^{2-} = [\text{CaCO}_3]$                          | 3.22  | NIST                     |
| $\text{Ca}^{2+} + \text{HCO}_3^- = [\text{CaHCO}_3]^+$                         | 0.29  | NIST                     |
| $\text{Ca}^{2+} + \text{Citrate}^{3-} = [\text{CaCitrate}]^-$                  | 3.48  | NIST                     |
| $\text{Ca}^{2+} + \text{HCitrate}^{2-} = [\text{CaHCitrate}]$                  | 2.07  | NIST                     |
| $\text{Ca}^{2+} + \text{Lactate}^- = [\text{CaLactate}]^+$                     | 1.12  | NIST                     |
| $\text{Ca}^{2+} + 2 \text{Lactate}^- = [\text{CaLactate}_2]$                   | 1.62  | NIST                     |
| $\text{Ca}^{2+} + \text{HO}^- = [\text{CaOH}]^+$                               | 1.3   | NIST                     |
|                                                                                |       |                          |
| $\text{PO}_4^{3-} + \text{H}^+ = \text{HPO}_4^{2-}$                            | 11.8  | NIST                     |
| $\text{HPO}_4^{2-} + \text{H}^+ = \text{H}_2\text{PO}_4^-$                     | 6.88  | NIST                     |
| $\text{H}_2\text{PO}_4^- + \text{H}^+ = \text{H}_3\text{PO}_4$                 | 1.99  | NIST                     |
| $\text{CO}_3^{2-} + \text{H}^+ = \text{HCO}_3^-$                               | 9.9   | NIST                     |
| $\text{HCO}_3^- + \text{H}^+ = \text{H}_2\text{CO}_3$                          | 6.13  | NIST                     |
| $\text{Oxalate}^{2-} + \text{H}^+ = \text{HOxalate}^-$                         | 3.82  | NIST                     |
| $\text{HOxalate}^- + \text{H}^+ = \text{H}_2\text{Oxalate}$                    | 1.2   | NIST                     |
| $\text{Lactate}^- + \text{H}^+ = \text{HLactate}$                              | 3.67  | NIST                     |
| $\text{Citrate-O}^- + \text{H}^+ = \text{Citrate}^{3-}$ (Hydroxyl proton)      | 13.5  | Heller 2012 <sup>a</sup> |
| $\text{Citrate}^{3-} + \text{H}^+ = \text{HCitrate}^{2-}$                      | 5.7   | Heller 2012 <sup>a</sup> |
| $\text{HCitrate}^{2-} + \text{H}^+ = \text{H}_2\text{Citrate}^-$               | 4.4   | Heller 2012 <sup>a</sup> |
| $\text{H}_2\text{Citrate}^- + \text{H}^+ = \text{H}_3\text{Citrate}$           | 2.9   | Heller 2012 <sup>a</sup> |
| $\text{DOTA}^{4-} + \text{H}^+ = \text{HDOTA}^{3-}$                            | 11.2  | NIST                     |
| $\text{HDOTA}^{3-} + \text{H}^+ = \text{H}_2\text{DOTA}^{2-}$                  | 9.73  | NIST                     |
| $\text{H}_2\text{DOTA}^{2-} + \text{H}^+ = \text{H}_3\text{DOTA}^-$            | 4.44  | NIST                     |
| $\text{H}_3\text{DOTA}^- + \text{H}^+ = \text{H}_4\text{DOTA}$                 | 4.34  | NIST                     |
| $\text{H}_4\text{DOTA} + \text{H}^+ = \text{H}_5\text{DOTA}^+$                 | 2.35  | NIST                     |
| $\text{DTPA}^{5-} + \text{H}^+ = \text{HDTPA}^{4-}$                            | 10.4  | NIST                     |
| $\text{HDTPA}^{4-} + \text{H}^+ = \text{H}_2\text{DTPA}^{3-}$                  | 8.55  | NIST                     |
| $\text{H}_2\text{DTPA}^{3-} + \text{H}^+ = \text{H}_3\text{DTPA}^{2-}$         | 4.28  | NIST                     |

|                                                                        |        |                           |
|------------------------------------------------------------------------|--------|---------------------------|
| $\text{H}_3\text{DTPA}^{2-} + \text{H}^+ = \text{H}_4\text{DTPA}^-$    | 2.7    | NIST                      |
| $\text{H}_4\text{DTPA}^- + \text{H}^+ = \text{H}_5\text{DTPA}$         | 2.0    | NIST                      |
| $\text{H}_5\text{DTPA} + \text{H}^+ = \text{H}_6\text{DTPA}^+$         | 1.6    | NIST                      |
| $\text{H}_6\text{DTPA}^+ + \text{H}^+ = \text{H}_7\text{DTPA}^2$       | 0.7    | NIST                      |
| $\text{DTPA-BMA}^{3-} + \text{H}^+ = \text{HDTPA-BMA}^{2-}$            | 9.37   | NIST                      |
| $\text{HDTPA-BMA}^{2-} + \text{H}^+ = \text{H}_2\text{DTPA-BMA}^-$     | 4.38   | NIST                      |
| $\text{H}_2\text{DTPA-BMA}^- + \text{H}^+ = \text{H}_3\text{DTPA-BMA}$ | 3.31   | NIST                      |
| $\text{HOPO}^{4-} + \text{H}^+ = \text{HHOPO}^{3-}$                    | 6.64   | Abergel 2009 <sup>c</sup> |
| $\text{HHOPO}^{3-} + \text{H}^+ = \text{H}_2\text{HOPO}^{2-}$          | 5.68   | Abergel 2009 <sup>c</sup> |
| $\text{H}_2\text{HOPO}^{2-} + \text{H}^+ = \text{H}_3\text{HOPO}^-$    | 5.01   | Abergel 2009 <sup>c</sup> |
| $\text{H}_3\text{HOPO}^- + \text{H}^+ = \text{H}_4\text{HOPO}$         | 3.87   | Abergel 2009 <sup>c</sup> |
| $\text{H}_2\text{O} = \text{H}^+ + \text{HO}^-$                        | -13.77 | NIST                      |

Notes: Most log K values are given for an ionic strength of 0.1M and at 25°C, see corresponding reference for more information. NIST: A. E. Martell, R. M. Smith, R. J. Motekaitis, NIST Critically Selected Stability Constants of Metal Complexes: Version 8.0. a: Heller et al. *Dalton Trans.*, 2012, 41, 13969. Values for the Gd-citrate complexes were considered identical to those of the Eu-citrate complexes. b: Sturzbecher-Hoehne et al., *Dalton Trans.*, 2011, 40, 8340-8346. The protonation constant of the [GdHOPO]<sup>-</sup> complex was considered similar to that of the [EuHOPO]<sup>-</sup> complex. c: Abergel et al. *Inorg. Chem.* 2009, 48, 10868–10870.

**Supporting Figure S1.** Murine organ content of  $^{153}\text{Gd}$  four days following contamination via intravenous injection into a warmed lateral tail vein, reported as % RD for each treatment group. Treatments were administered at a dose of  $100\ \mu\text{mol} / \text{kg}$  via ip injection at times varying from 24 h pre- to 48 h post-Gd injection. Data points correspond to the values obtained for each mouse in a group ( $n = 4$ ). Organs are ranked in order of contribution to the total RD. Control = squares, HOPO = triangles, DTPA = circles.

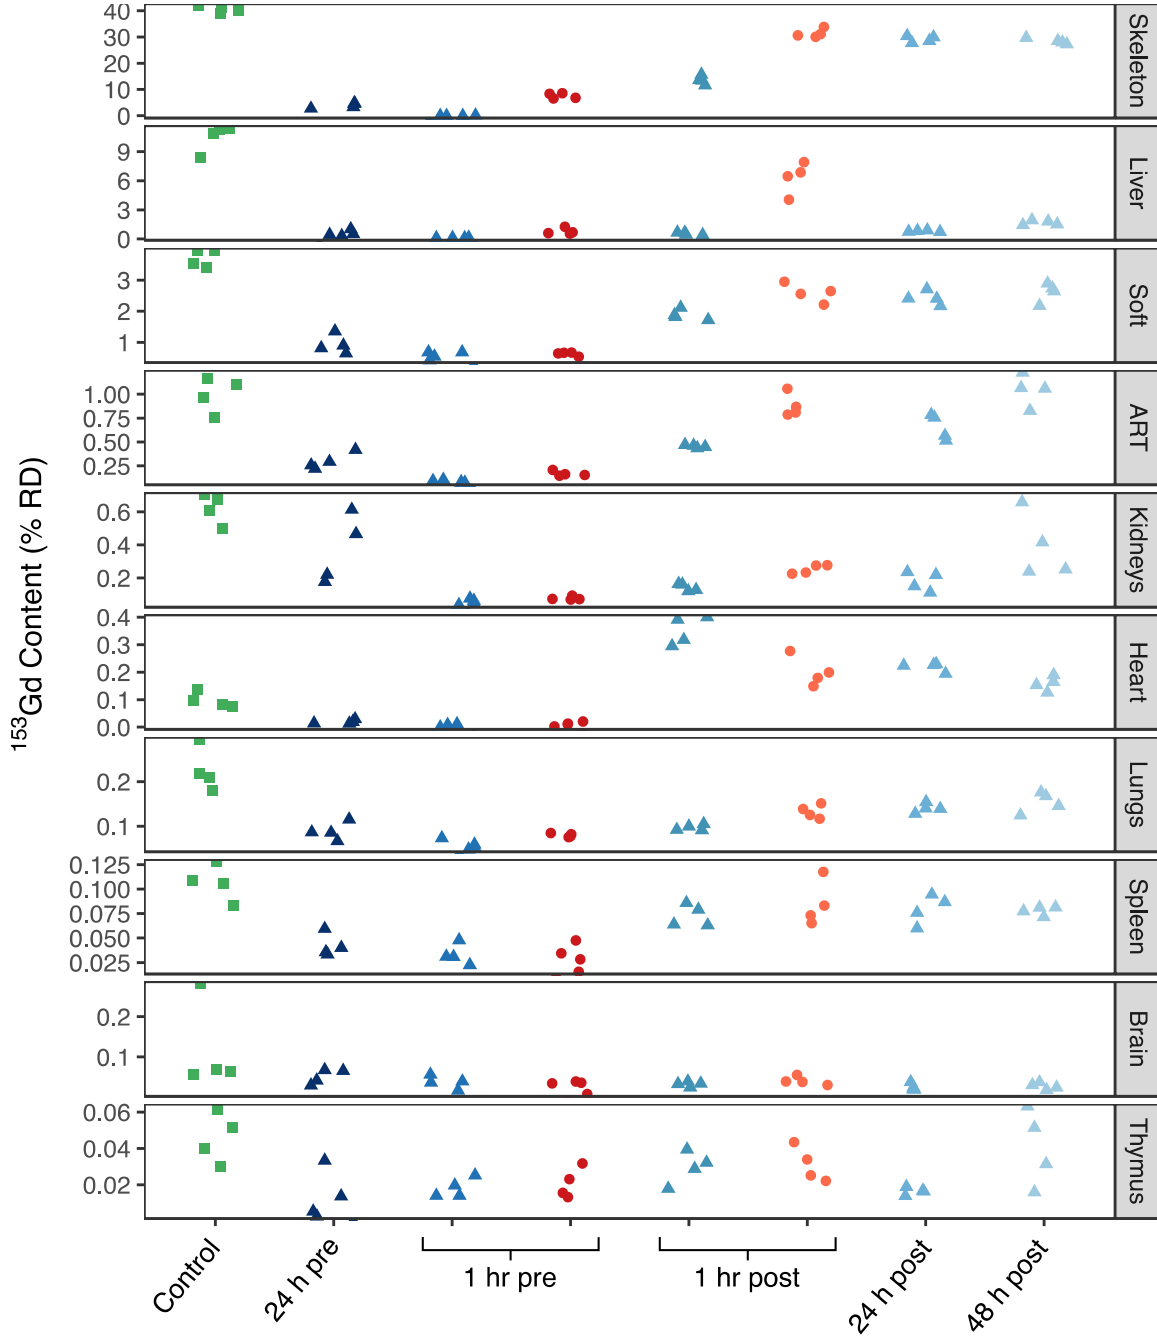

**Supporting Figure S2.** Cumulative  $^{153}\text{Gd}$  excretion by study day and excretion route, reported as percentage of the total recovered dose. Treatments were administered at a dose of  $100\ \mu\text{mol}/\text{kg}$  via ip injection at times varying from 24 h pre- to 48 h post-Gd injection. Consistent with  $^{153}\text{Gd}$  content of body, pre-treatment with HOPO shows it is most efficacious.

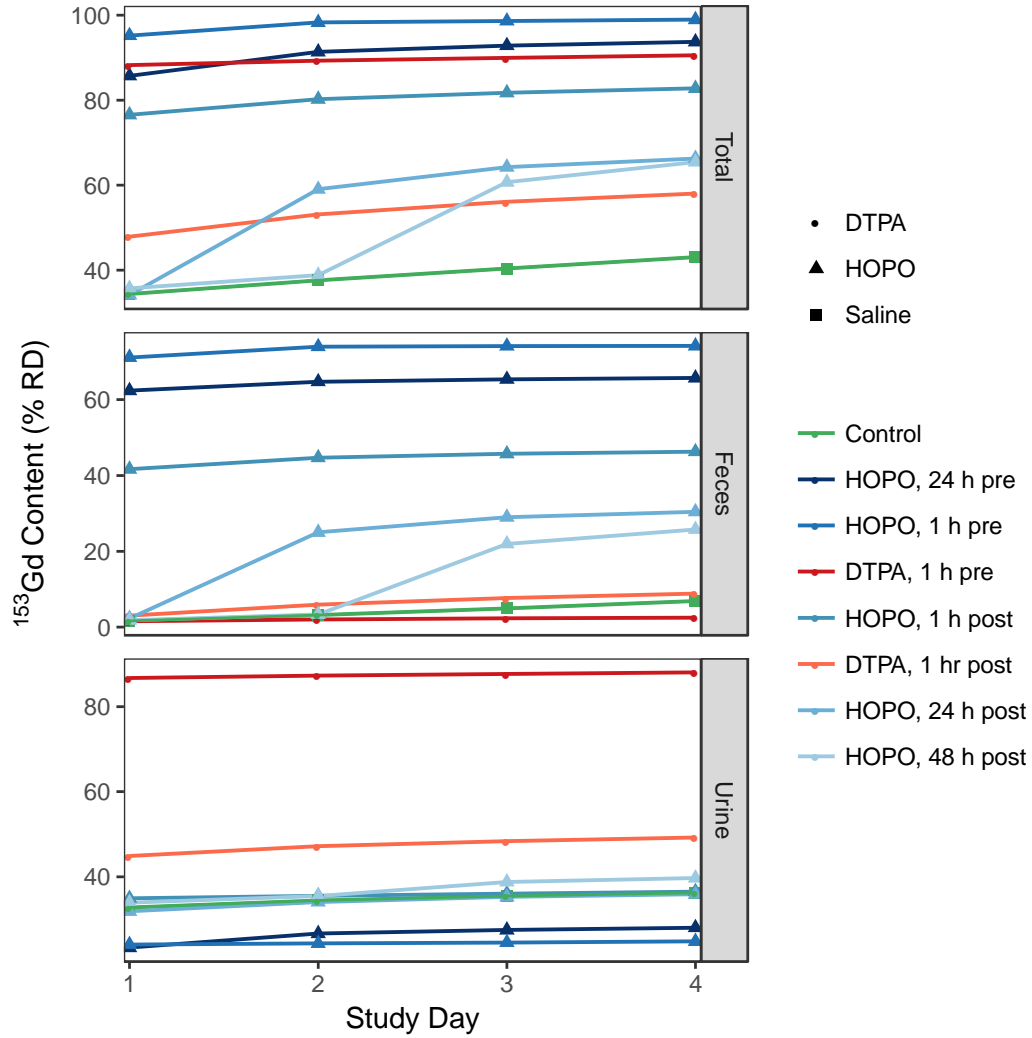



**Supporting Figure S3.** Calculated speciation of gadolinium under physiological conditions and for a concentration of Gd corresponding to 5% of the typical amount of GBCA injected to a patient.  $[Gd] = 7.15 \mu M$ .  $[Phosphate] = 1.1 \text{ mM}$ ,  $[Carbonate] = 25 \text{ mM}$ ,  $[Oxalate] = 9.2 \mu M$ ,  $[lactate] = 1.5 \text{ mM}$ ,  $[Citrate] = 160 \mu M$ .  $pH = 7.4$ . Citrate species are displayed in yellow, the phosphate species in red, and the carbonate species in blue.

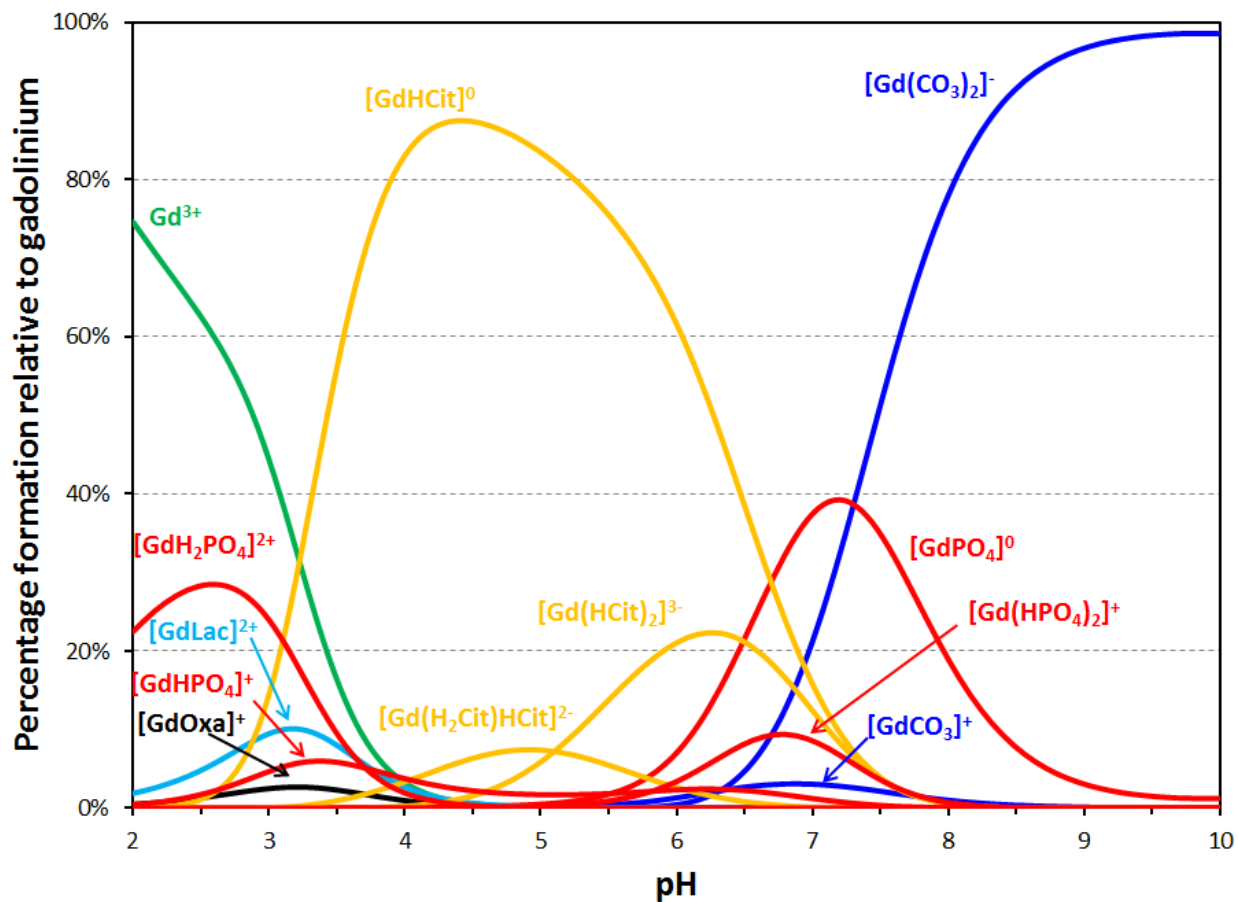



**Supporting Figure S5.** Calculated percentage of gadolinium bound to DTPA as a function of dilution and in the presence of bio-relevant chelators. Calculations in the presence of calcium (1.1 mM) or zinc (15  $\mu$ M) ions are also given for comparison. Total concentrations of phosphates (1.1 mM), carbonates (25 mM), oxalates (9.2  $\mu$ M), lactates (1.5 mM), and citrates (160  $\mu$ M) held constant to match physiological conditions. Ratio Gd/DTPA = 1.0 mol/mol. pH = 7.4. See Table S3 for stability constants used in these speciation simulations.

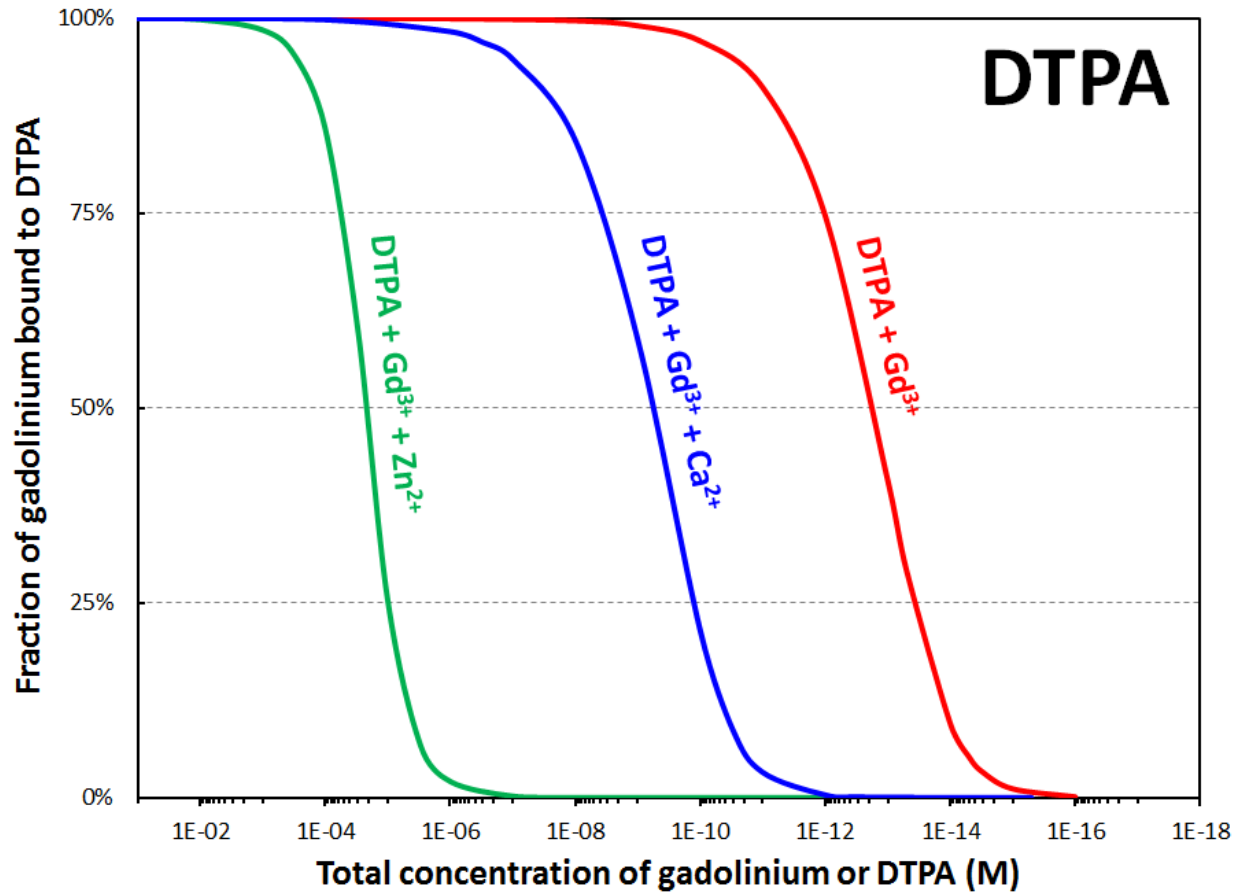

**Supporting Figure S6.** Calculated percentage of gadolinium bound to DTPA-BMA as a function of dilution and in the presence of bio-relevant chelators. Calculations in the presence of calcium (1.1 mM) or zinc (15  $\mu\text{M}$ ) ions are also given for comparison. Total concentrations of phosphates (1.1 mM), carbonates (25 mM), oxalates (9.2  $\mu\text{M}$ ), lactates (1.5 mM), and citrates (160  $\mu\text{M}$ ) held constant to match physiological conditions. Ratio Gd/DTPA-BMA = 1.0 mol/mol. pH = 7.4. See Table S3 for stability constants used in these speciation simulations.

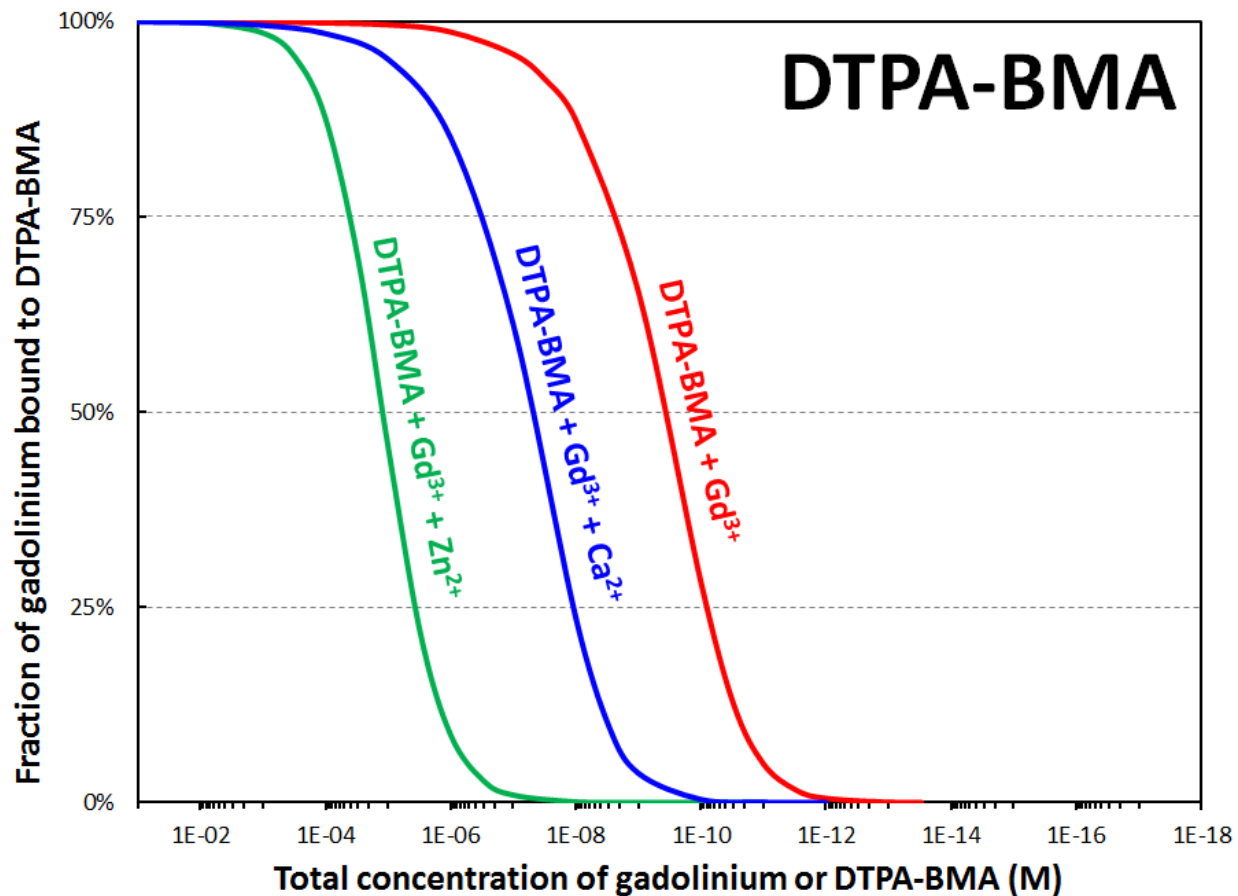

Supplement: 41598_2018_22511_MOESM1_ESM.pdf [file 41598_2018_22511_MOESM1_ESM.pdf]
